1 **(-)-Epicatechin alters reactive oxygen and nitrogen species production**  
2 **independent of mitochondrial respiration in human vascular endothelial**  
3 **cells**

4

5 Daniel G. Sadler<sup>1</sup>; Jonathan Barlow<sup>2</sup>; Richard Draijer<sup>3</sup>; Helen Jones<sup>1</sup>; Dick H. J. Thijssen<sup>1</sup>;  
6 Claire E. Stewart<sup>1</sup>.

7 <sup>1</sup>School of Sport and Exercise Science, Liverpool John Moores University, Liverpool, United  
8 Kingdom

9 <sup>2</sup>Mitochondrial Profiling Centre, School of Sport, Exercise and Rehabilitation Sciences,  
10 University of Birmingham, Birmingham, United Kingdom

11 <sup>3</sup>Unilever Foods Innovation Centre, Bronland 14, 6708 WH Wageningen, The Netherlands

12 **Corresponding Author:** Claire E. Stewart

13 **Address Correspondence:** Research Institute for Sport and Exercise Sciences, Liverpool  
14 John Moores University, Byrom Street, L3 3AF, Liverpool, UK

15 **Telephone number:** +44 (0)151 904 6234

16 **E-mail address:** C.E.Stewart@ljmu.ac.uk

17

18 **Author email addresses:**

19 Daniel G. Sadler: Dan\_sadler94@hotmail.co.uk

20 Jonathan Barlow: J.P.Barlow@bham.ac.uk

21 Richard Draijer: Richard.Draijer@unilever.com

22 Helen Jones: H.Jones1@ljmu.ac.uk

23 Dick H. J. Thijssen: D.Thijssen@ljmu.ac.uk

24

25 **Running head:** (-)-Epicatechin alters reactive oxygen and nitrogen species production

26

27

28

29

30 **Abstract**

31 **Introduction:** Vascular endothelial dysfunction is characterised by lowered nitric oxide (NO)  
32 bioavailability, which may be explained by increased production of reactive oxygen species  
33 (ROS), mitochondrial dysfunction and altered cell signalling. (-)-Epicatechin (EPI) has proven  
34 effective in the context of vascular endothelial dysfunction, but the underlying mechanisms  
35 associated with EPI's effects remain unclear.

36 **Objective(s):** Our aim was to investigate whether EPI impacts reactive oxygen and nitrogen  
37 species (RONS) production and mitochondrial function of human vascular endothelial cells  
38 (HUVECs). We hypothesised that EPI would attenuate ROS production, increase NO  
39 bioavailability, and enhance indices of mitochondrial function.

40 **Methods:** HUVECs were treated with EPI (0-20  $\mu$ M) for up to 48 h. Mitochondrial and cellular  
41 ROS were measured in the absence and presence of antimycin A (AA), an inhibitor of the  
42 mitochondrial electron transport protein complex III, favouring ROS production. Genes  
43 associated with mitochondrial remodelling and the antioxidant response were quantified by  
44 RT-qPCR. Mitochondrial bioenergetics were assessed by respirometry and signalling  
45 responses determined by western blotting.

46 **Results:** Mitochondrial superoxide production without AA was increased 32% and decreased  
47 53% after 5 and 10  $\mu$ M EPI treatment vs. CTRL ( $P<0.001$ ). With AA, only 10  $\mu$ M EPI  
48 increased mitochondrial superoxide production vs. CTRL (25%,  $P<0.001$ ). NO bioavailability  
49 was increased by 45% with 10  $\mu$ M EPI vs. CTRL ( $P=0.010$ ). However, EPI did not impact  
50 mitochondrial respiration. NRF2 mRNA expression was increased 1.5- and 1.6-fold with 5 and  
51 10  $\mu$ M EPI over 48 h vs. CTRL ( $P=0.015$  and  $P=0.001$ , respectively). Finally, EPI transiently  
52 enhanced ERK1/2 phosphorylation (2.9 and 3.2-fold over 15 min and 1 h vs. 0 h, respectively;  
53  $P=0.035$  and  $P=0.011$ ).

54 **Conclusion(s):** EPI dose dependently alters RONS production of HUVECs but does not impact  
55 mitochondrial respiration. The induction of NRF2 mRNA expression with EPI might relate to  
56 enhanced ERK1/2 signalling, rather than RONS production. In humans, EPI may improve  
57 vascular endothelial dysfunction via alteration of RONS and activation of cell signalling.

58

59

60

61

62

## 63 **Introduction**

64 Globally, cardiovascular disease (CVD) is the leading cause of morbidity and mortality  
65 (WHO, 2018). One major risk factor for CVD is vascular endothelial dysfunction, which is  
66 typified by impaired vasodilation and diminished blood flow (Heitzer et al., 2001; Suwaidi et  
67 al., 2000). Several factors contribute to vascular endothelial dysfunction, including reduced  
68 nitric oxide (NO) bioavailability and elevated oxidative stress (Ungvari et al., 2018). A decline  
69 in NO bioavailability has been attributed to lower endothelial nitric oxide synthase (eNOS)  
70 content and activity, in part due to lower phosphorylation of eNOS at Ser1177 - at least in the  
71 aged vascular endothelium (Gliemann et al., 2018; Musicki et al., 2005). Elevated oxidative  
72 stress might be explained increased production of ROS (Cernadas et al., 1998; Chou et al.,  
73 1998; Donato et al., 2007, 2009), that are cytosolic and mitochondrial in origin (Csiszar et al.,  
74 2002, 2007; Donato et al., 2007; Hamilton et al., 2001; Jablonski et al., 2007; Sun et al., 2004;  
75 Van Der Loo et al., 2000).

76

77 Vascular endothelial health is also impacted by mitochondrial function. Indeed, ageing is  
78 associated with reduced mitochondrial content in endothelial cells of conduit arteries, feed  
79 arteries and capillaries (Burns et al., 1979; S. H. Park et al., 2018; S.-Y. Park et al., 2018;  
80 Ungvari et al., 2008), which could be due to blunted transcriptional responses (S.-Y. Park et  
81 al., 2018; Ungvari et al., 2008). This potential reduction in mitochondrial biogenesis with  
82 ageing may result from diminished NO bioavailability (Gouill et al., 2007; Miller et al., 2013)  
83 and/or lowered AMP-activated protein kinase (AMPK) signalling (Lesniewski et al., 2012),  
84 both of which are known to activate peroxisome proliferator-activated receptor gamma  
85 coactivator 1-alpha (PGC-1 $\alpha$ ). A link between mitochondria and vascular endothelial  
86 dysfunction has also been made from observations that human skeletal muscle feed arteries  
87 exhibit impaired respiratory capacity and lower coupling efficiency in middle- (55 years) and  
88 older-age (70 years) compared to young adults (S. H. Park et al., 2018; S.-Y. Park et al., 2020).  
89 Furthermore, mitochondrial-targeted antioxidants like Mitoquinone (MitoQ) restore vascular  
90 endothelial dysfunction in aged mice and patients with peripheral artery disease, which likely  
91 results from reductions in levels of mitochondrial superoxide (Gioscia-Ryan et al., 2014; S.-Y.  
92 Park et al., 2020). Together, evidence points towards mitochondria as promising targets for  
93 interventions aimed at combatting vascular endothelial dysfunction.

94

95 (-)-Epicatechin (EPI) belongs to a subclass of flavonoids known as the flavanols. Not only  
96 is EPI highly bioavailable – reaching up to 10  $\mu$ M in circulation in humans (Hollands et al.,  
97 2013) - but EPI is also associated with several health benefits (Arts et al., 2001; Hertog et al.,  
98 1993), including improved vascular endothelial function (Galleano et al., 2013; Karim et al.,  
99 2000; Schroeter et al., 2006) and increased NO bioavailability (Schroeter et al., 2006).  
100 Additional mechanisms thought to underly the therapeutic effects of EPI include: increased  
101 eNOS phosphorylation (Ramirez-Sanchez et al., 2011, 2012, 2018), enhanced content or  
102 activity of enzymatic antioxidant proteins (Moreno-Ulloa, Nogueira, et al., 2015; Ramirez-  
103 Sanchez et al., 2014) and augmented mitochondrial biogenesis (Lee et al., 2015; Ramirez-  
104 Sanchez et al., 2018; Taub et al., 2012, 2016). Whilst the potential of EPI to enhance markers  
105 of mitochondrial biogenesis and antioxidant capacity seems promising, it is unclear whether  
106 this effect translates to enhanced respiratory function or altered ROS production of vascular  
107 endothelial cells. In-fact, one recent study reported no impact of EPI on mitochondrial  
108 respiration (Keller et al., 2020), but the authors demonstrated that EPI may lower mitochondrial  
109 ROS production of HUVECs in the presence of high glucose. The challenge remains to resolve  
110 whether EPI modulates ROS production and mitochondrial function of vascular endothelial  
111 cells.

112  
113 To this end, our aim was to investigate whether EPI modulates reactive oxygen and nitrogen  
114 species (RONS) production and mitochondrial function of human vascular endothelial cells.  
115 We hypothesised that EPI would attenuate ROS production, augment NO bioavailability, and  
116 enhance indices of mitochondrial function.

117

118

## 119 **Materials and Methods**

### 120 ***Cell culture and treatment***

121 Human umbilical endothelial vein endothelial cells (HUVECs; Thermo Fisher Scientific,  
122 Waltham, MA, USA) at passages 3-7 were used in this study. HUVECs were not passaged  
123 more than 7 times because of changes in cell phenotype that can occur with multiple population  
124 doublings that ultimately lead to senescence (Chang et al., 2005; Cheung, 2007; Grillari et al.,  
125 2000). Following the plating of cells onto pre-gelatinised well-plates (0.2% gelatin) in  
126 complete endothelial cell growth medium (EGM; Cell Applications Inc, San Diego, CA, USA),  
127 ~80% confluent HUVECs were washed twice with Dulbecco's phosphate-buffered saline (D-

128 PBS) and switched to pre-warmed (37°C) EGM in the absence (vehicle [H<sub>2</sub>O], ‘CTRL’) or  
129 presence of EPI (0.5-20 µM) over 24 h and 48 h. Human umbilical endothelial vein endothelial  
130 cells (HUVECs; Thermo Fisher Scientific, Waltham, MA, USA) at passages 3-7 were used in  
131 this study. HUVECs were not passaged more than 8 times because of changes in cell phenotype  
132 that can occur with multiple population doublings that ultimately lead to senescence (Chang et  
133 al., 2005; Cheung, 2007; Grillari et al., 2000). Following the plating of cells onto pre-  
134 gelatinised well-plates (0.2% gelatin) in complete endothelial cell growth medium (EGM; Cell  
135 Applications Inc, San Diego, CA, USA), ~80% confluent HUVECs were washed twice with  
136 Dulbecco's phosphate-buffered saline (D-PBS) and switched to pre-warmed (37°C) EGM in  
137 the absence (vehicle [H<sub>2</sub>O], ‘CTRL’) or presence of EPI (0-20 µM) over 24 h and 48 h.

138

### 139 ***Cell viability***

140 The fluorescent CyQUANT<sup>®</sup> Proliferation Assay kit was used to determine cell viability.  
141 HUVECs were grown to 60-70% confluency in EGM in gelatinised 96-well plates. Cells were  
142 subsequently dosed for 24 h in EGM +/- EPI at 0-20 µM. After 24 h, wells were aspirated,  
143 washed twice with D-PBS, and then frozen immediately at -80°C. On the day of the assay,  
144 plates were thawed at room temperature and CyQUANT<sup>®</sup> GR dye/cell-lysis buffer was added  
145 to each well according to manufacturer instructions. Plates were gently mixed on an orbital  
146 shaker (80 rpm) for 5 minutes protected from light. Sample fluorescence was measured using  
147 a CLARIOStar plate reader (BMG Labtech, Ortenberg, Germany) with 485/520 Ex/Em.

148

### 149 ***Mitochondrial ROS production***

150 Mitochondrial superoxide was detected in HUVECs using MitoSOX (Thermo Fisher  
151 Scientific, Waltham, USA), a hydroethidine probe which is targeted to mitochondria by a  
152 conjugated triphenyl-phosphonium moiety (Zielonka et al., 2017). HUVECs were seeded at  $3$   
153  $\times 10^4$  cells/mL in gelatinised 12-well microplates and at ~80% confluence dosed +/- EPI (0-10  
154 µM) for 24 h. Next, cells were washed in Krebs-Ringer buffer (KRH; 135 mM NaCl, 3.6 mM  
155 KCl, 10 mM HEPES (pH 7.4), 0.5 mM MgCl<sub>2</sub>, 1.5 mM CaCl<sub>2</sub>, 0.5 mM NaH<sub>2</sub>PO<sub>4</sub>, 2 mM  
156 glutamine and 5 mM D(+)-Glucose) prior to incubation at 37°C for 30 minutes, with or without  
157 15 µM antimycin A (AA) to stimulate mitochondrial superoxide production. Next, AA-  
158 containing KRH was removed and MitoSOX was loaded into cells in fresh pre-warmed KRH  
159 to a final concentration of 2.5 µM. Plates were immediately transferred to a plate reader

160 (ClarioStar, BMG Labtech) and fluorescence was monitored continuously at 30-sec intervals  
161 over 30 min at excitation/emission of 510/580 nm. Rates of mitochondrial superoxide  
162 production were determined from the slope of the resultant progress curve over the 30-minute  
163 recording. Finally, plates were immediately fixed in 1% (v/v) acetic acid in methanol for the  
164 determination of cell density by the Sulforhodamine B (SRB) assay, which was used to  
165 normalise obtained fluorescence values. The plate reader's focal height and gain were  
166 optimised and fixed between different experiments.

167

### 168 ***Cellular ROS***

169 Cellular ROS were detected using the CellROX<sup>®</sup> Deep Red reagent by spectrophotometry.  
170 HUVECs were seeded at  $3 \times 10^4$  cells/mL into gelatinised 12-well microplates and at ~80%  
171 confluence dosed +/- EPI (0-10  $\mu$ M) for 24 h. After treatment, HUVECs were washed in KRH  
172 with or without 15  $\mu$ M AA and incubated at 37°C for 30 minutes, prior to KRH removal and  
173 CellROX loading using fresh, pre-warmed KRH buffer, to a final concentration of 2.5  $\mu$ M.  
174 Following 30 minutes CellROX incubation protected from light, cells were washed 2  $\times$  with  
175 D-PBS and immediately transferred to a plate reader (ClarioStar, BMG Labtech), where  
176 fluorescent CellROX oxidation products were excited at 640 nm and light emission detected at  
177 665 nm. The plate reader's focal height and gain were optimised and fixed between  
178 experiments. Upon completion of the reading, plates were immediately fixed for the  
179 determination of cell density by as discussed above.

180

### 181 ***Nitric oxide bioavailability***

182 To assess intracellular NO bioavailability, HUVECs were plated and cultured as previously  
183 described. At ~80% confluency, cells were treated with 0, 5 or 10  $\mu$ M EPI for 24 h. After  
184 treatment, HUVECs were washed 2  $\times$  with D-PBS and loaded with DAF-FM<sup>™</sup> diacetate (4-  
185 amino-5-methylamino- 2',7'-difluorofluorescein diacetate; Molecular Probes, Invitrogen) to a  
186 final concentration of 1  $\mu$ M in KRH buffer and incubated at 37°C for 45 minutes protected  
187 from light. Following dye loading, cells were washed 2  $\times$  with D-PBS and immediately  
188 trypsinised prior to pelleting and resuspension in D-PBS. Sample fluorescence was  
189 subsequently detected at 495/515 Ex/Em by flow cytometry (BD Accuri C6, BD Biosciences,  
190 Wokingham, UK). Data were recorded from 5,000 events and median values reported.

191

### 192 ***RT-qPCR – Gene expression quantification***

193 HUVECs were grown to ~70% confluency in EGM in gelatinised 12-well plates and lysed  
194 in 125  $\mu$ L TRIzol. Total RNA was then extracted using the phenol-chloroform method. RNA  
195 concentrations were determined by spectrophotometry (NanoDrop™ 2000, Thermo Fisher  
196 Scientific, Waltham, USA). Specific primers used in each PCR are outlined in supplementary  
197 Table 1. After preparation, reaction tubes were transferred to a Rotor-Gene Q PCR thermal  
198 cyclor for product amplification using a one-step protocol (QuantiFast SYBR® Green RT-PCR  
199 Kit, Qiagen, UK). The amplification protocol was as follows: reverse transcription (10 minutes  
200 at 50°C), transcriptase inactivation and initial denaturation (95°C for 5 min) followed by 40  $\times$   
201 amplification cycles consisting of: 95°C for 10 s (denaturation) and 60°C for 30 s (annealing  
202 and extension); followed by melt curve detection. Critical threshold ( $C_T$ ) values were derived  
203 from setting a threshold of 0.09 for all genes. To quantify gene expression,  $C_T$  values were used  
204 to quantify relative gene expression using the comparative Delta Delta  $C_T$  ( $2^{-\Delta\Delta C_T}$ ) equation  
205 (Livak & Schmittgen, 2001), whereby the expression of the gene of interest was determined  
206 relative to the internal reference gene (RPL13a) in the treated sample, compared with the  
207 untreated zero-hour control.

208

### 209 ***Mitochondrial respiration***

210 HUVECs (passages 4-6) were seeded in XFe 24 well plates (Agilent, Santa Clara, CA,  
211 USA) at 30,000 cells per well in 200  $\mu$ L EGM for 48 h. After 48 h, HUVECs were washed  
212 twice with D-PBS and replaced with fresh EGM containing 0, 5 and 10  $\mu$ M EPI for 24 h. On  
213 the day of the assay, HUVECs were washed with pre-warmed XF Dulbecco's Modified Eagle  
214 Medium pH 7.4 (DMEM; Agilent, Santa Clara, CA, USA), supplemented with 5.5 mM  
215 glucose, 1 mM sodium pyruvate and 2 mM L-Glutamine, and brought to a final well volume  
216 of 500  $\mu$ L. The cells were incubated in this medium for 45 minutes at 37°C in a non-CO<sub>2</sub>  
217 incubator and then transferred to a Seahorse XFe24 extracellular flux analyser (Agilent, Santa  
218 Clara, CA, USA) maintained at 37°C. After an initial 15-minute calibration, oxygen  
219 consumption rate (OCR) was measured by a 3-4 loop cycle consisting of a 1-min mix, 2-min  
220 wait and 3-min measure to record cellular respiration. After measuring basal respiration, 2 mM  
221 oligomycin was added to selectively inhibit the mitochondrial ATP synthase. Subsequently, 3  
222  $\mu$ M BAM15 was added to uncouple OCR to determine maximal respiration, and finally a  
223 mixture of 2  $\mu$ M rotenone and 2  $\mu$ M AA was added to inhibit complex I and III of the electron  
224 transfer system, respectively, to determine non-mitochondrial respiration. Rates of oxygen  
225 consumption were corrected for non-mitochondrial respiration and expressed relative to the

226 cell number of the appropriate well, determined by the CyQUANT<sup>®</sup> assay. The raw values of  
227 extracellular acidification rate (ECAR) and OCR were divided into component rates to  
228 calculate the relative contribution of glycolytic (ATP<sub>glyc</sub>) and oxidative ATP-producing  
229 reactions (ATP<sub>ox</sub>) to total ATP production, as previously described (Mookerjee & Brand,  
230 2015). Three independent experiments were performed that contained at least two technical  
231 replicates.

232

### 233 ***SDS-PAGE and immunoblotting***

234 Total protein and phosphoprotein levels were detected by western blot. Following  
235 treatment, HUVECs were lysed and scraped in ice-cold 1x precipitation assay buffer  
236 containing: 25 mM Tris-HCl pH 7.6, 150 mM NaCl, 1% NP-40, 1% sodium deoxycholate and  
237 0.1% SDS, supplemented with 1x Protease Inhibitor Cocktail Set V (Merck Life Science, UK).  
238 Cell lysates were centrifuged for 15 minutes at 18,000 × g (4°C) and the supernatant was stored  
239 at -80°C before analyses for total protein by the Pierce BCA<sup>™</sup> assay. Samples were  
240 subsequently resuspended in 4x Laemmli buffer (Bio-Rad laboratories, Hertfordshire, UK)  
241 containing reducing agent (1x working concentration: 31.5 mM Tris-HCl [pH 6.8], 10%  
242 glycerol, 1% SDS, 0.005% Bromophenol Blue and 355 mM 2-mercaptoethanol) and were  
243 loaded and electrophoresed on 10% SDS-stain-free polyacrylamide gels (supplementary Figure  
244 1). Semi-dry transfer of proteins to a nitrocellulose membrane was performed using the Trans-  
245 Blot<sup>®</sup> Turbo<sup>™</sup> Transfer System. Following blocking for 1-hour in Tris-buffered saline Tween-  
246 20 (TBS-T) containing 5% non-fat dried milk (NFDM), membranes were incubated overnight  
247 with rabbit anti-phosphorylated or total antibodies: AMPK $\alpha$ , pThr172-AMPK, p44/42 MAPK,  
248 pThr202/Tyr204-p44/42 MAPK, eNOS and pSer1177-eNOS, at a dilution of 1:500-1:4000 in  
249 5% bovine serum albumin (BSA) made up in TBS-T (see Table 1). After overnight incubation,  
250 the membranes were washed 3 times in TBS-T for 5 minutes and incubated for 1 hour in HRP-  
251 conjugated anti-rabbit antibodies (Cell Signaling Technology, London, UK) at dilution of  
252 1:5000-1:10,000, following optimisation. Proteins were visualised by enhanced  
253 chemiluminescence (Thermo Fisher Scientific inc, Waltham, USA) and quantified by  
254 densitometry (ChemiDoc<sup>™</sup> MP imaging system, Bio-Rad Laboratories, Inc. CA, USA).  
255 Analysed western blot images are presented in supplementary figure 2.

256

257

258



259 **Table 1.** List of antibodies and dilutions used.

| Antibody                      | Primary Ab Dilution | Secondary Ab Dilution |
|-------------------------------|---------------------|-----------------------|
| AMPK $\alpha$                 | 1:1000              | 1:5000                |
| pThr172-AMPK                  | 1:1000              | 1:10,000              |
| p44/42 MAPK                   | 1:2000              | 1:10,000              |
| pThr202/Tyr204-p44/42<br>MAPK | 1:2000              | 1:10,000              |
| eNOS                          | 1:500               | 1:5000                |
| pSer1177-eNOS                 | 1:500               | 1:5000                |

260 All antibodies were purchased from Cell Signaling Technology.

261

## 262 **Statistical analysis**

263 One-way ANOVAs were employed to detect effects of EPI treatment. Two-way ANOVAs  
264 were employed to detect main effects (e.g., dose, time or antimycin A) and potential significant  
265 interactions between two main independent factors. Multiple comparisons between  
266 experimental conditions were adjusted for multiple tests, using Dunnett's or Sidak's where  
267 appropriate. All data are presented as mean $\pm$ SEM and significance accepted when  $P < 0.05$ .

268

269

## 270 **Results**

### 271 ***EPI does not cause vascular endothelial cell toxicity***

272 After 24 h EPI treatment (0.5-20  $\mu$ M dose responses), there was a significant main effect  
273 of dose on cell proliferation ( $P=0.018$ ; Figure 1). However, multiple comparisons revealed no  
274 significant difference between doses of EPI versus CTRL. Given that EPI did not cause cell  
275 toxicity, and prior knowledge of physiologic EPI concentrations *in vivo* (up to 10  $\mu$ M),  
276 subsequent experiments were performed with doses of 5 and 10  $\mu$ M.

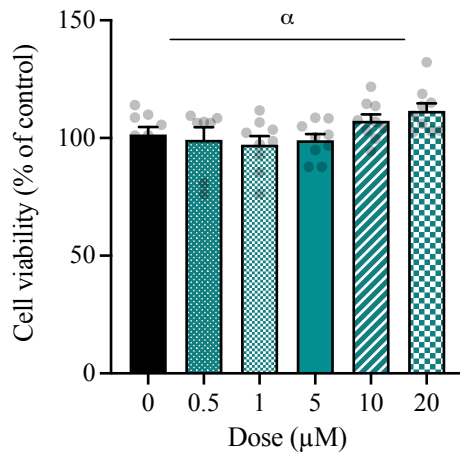

**Figure 1.** EPI does not cause vascular endothelial cell toxicity. HUVECs were treated with 0-20 µM EPI for 24 h. Data are means±SEM, representative of 3 independent repeats with 3 replicates of each condition. Statistical significance was tested for by one-way ANOVA and Dunnett's test for multiple comparisons. <sup>α</sup> Significant main effect of dose ( $P<0.05$ ).

277

278

### 279 ***EPI dose-dependently modulates mitochondrial RONS production***

280 Next, we assessed whether EPI, in the absence or presence of the complex III inhibitor,  
281 AA, impacted mitochondrial superoxide emission. There was a significant main effect of dose  
282 and AA on rates of MitoSOX oxidation ( $P<0.001$ ), and a significant dose  $\times$  AA interaction  
283 ( $P<0.001$ ; Figure 2A). Post-hoc comparisons revealed that, in the absence of AA (-AA), 5 µM  
284 EPI significantly increased and 10 µM EPI decreased rates of MitoSOX oxidation compared  
285 to CTRL, respectively (CTRL:  $8.1 \times 10^{-5} \pm 0.2 \times 10^{-5}$ ; 5 µM EPI:  $10.7 \times 10^{-5} \pm 0.2 \times 10^{-5}$ ; 10 µM EPI:  
286  $3.8 \times 10^{-5} \pm 0.2 \times 10^{-5}$  RFU/sec<sup>-1</sup>/cell<sup>-1</sup>;  $P<0.001$ ). The associated raw traces of MitoSOX oxidation  
287 are displayed in Figure 2B. In the presence of AA (+AA), 5 µM EPI did not affect MitoSOX  
288 oxidation versus CTRL (5 µM EPI:  $35.4 \times 10^{-5} \pm 0.4 \times 10^{-5}$  vs. CTRL:  $35.4 \times 10^{-5} \pm 0.5 \times 10^{-5}$   
289 RFU/sec<sup>-1</sup>/cell<sup>-1</sup>; Figure 2A). Whereas 10 µM EPI significantly increased rates of MitoSOX  
290 oxidation compared to CTRL (10 µM EPI:  $44.4 \times 10^{-5} \pm 0.6 \times 10^{-5}$  vs. CTRL:  $35.4 \times 10^{-5} \pm 0.5 \times 10^{-5}$   
291 RFU/sec<sup>-1</sup>/cell<sup>-1</sup>;  $P<0.001$ ). In contrast to mitochondrial ROS, cellular ROS production (not  
292 mitochondrial-specific) was not altered by EPI (Figure 2C).

293

294 After revealing that rates of mitochondrial ROS production were dose-dependently  
295 altered by EPI, we assessed whether EPI modified intracellular NO levels. There was a  
296 significant main effect of EPI dose on NO levels ( $P=0.003$ ; Figure 2D). Whilst 5 µM EPI did  
297 not impact NO levels, 10 µM EPI significantly increased NO levels compared to CTRL  
298 conditions (10 µM EPI:  $4.38 \times 10^5 \pm 0.43 \times 10^5$  vs. CTRL:  $3.02 \times 10^5 \pm 0.18 \times 10^5$  AU;  $P=0.010$ ).

299

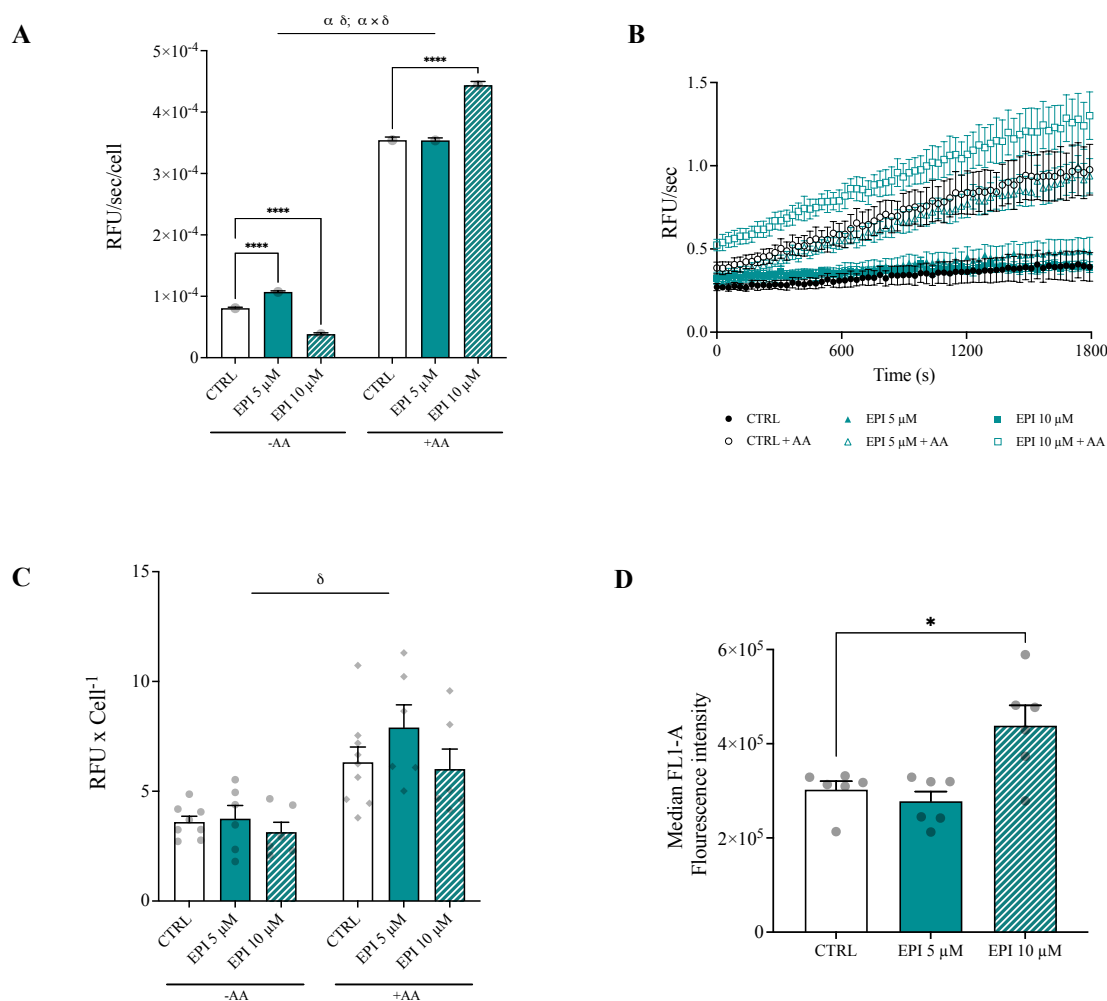

300 **Figure 2.** EPI dose-dependently impacts RONS production in vascular endothelial cells. A) MitoSOX  
 301 oxidation rates in HUVECs after 24 h EPI treatment and 30 minutes incubation with or without  
 302 antimycin A. B) Mean unnormalized MitoSOX oxidation rates measured in 30 second intervals over 30  
 303 minutes. C) CellROX oxidation in HUVECs after 24 h EPI treatment. D) DAF-FM oxidation in  
 304 HUVECs after 24 h EPI treatment measured by flow cytometry. Data are means $\pm$ SEM of three  
 305 independent repeats with two replicates per treatment. Statistical significance was tested for by a two-  
 306 way ANOVA, with dose and antimycin A as factors:  $\alpha$  Significant main effect of dose;  $\delta$  Significant  
 307 main effect of AA ( $P < 0.05$ ). \* $P < 0.05$  and \*\*\*\* $P < 0.0001$ .

308

309

### 310 ***EPI dose-dependently impacts the expression of genes associated with energy metabolism*** 311 ***in vascular endothelial cells***

312 Next, experiments were performed to resolve whether EPI alters the expression of genes  
 313 linked with mitochondrial function and the antioxidant response. Firstly, the expression of  
 314 genes associated with mitochondrial function and remodelling were quantified. In the presence  
 315 of EPI, there was a significant main effect of dose ( $P = 0.018$ ) and time ( $P = 0.002$ ) on dynamin-

316 related protein 1 (DRP1) expression (Figure 3A), but no significant dose  $\times$  time interaction. At  
317 48 h, 10  $\mu$ M EPI increased DRP1 expression 2.2-fold compared to CTRL ( $P=0.010$ ). There  
318 was a significant main effect of dose on mitofusin-2 (MFN2) mRNA expression in cells treated  
319 with EPI ( $P=0.035$ ; Figure 3B). With 10  $\mu$ M EPI, MFN2 expression increased 1.6-fold versus  
320 CTRL ( $P=0.024$ ). Parkin, PGC-1 $\alpha$ , and transcription Factor A (TFAM) expression were not  
321 changed by EPI treatment (supplementary Figure 3).

322

323 Genes associated with the antioxidant response were also quantified. There was no  
324 effect of dose or time on catalase or eNOS expression. There was a significant main effect of  
325 dose and time on NADPH oxidase 4 (NOX4) expression in EPI treated cells, respectively  
326 ( $P=0.015$  and  $P=0.006$ ). A significant main effect of dose was found on nuclear factor-  
327 erythroid factor 2-related factor 2 (NRF2) expression in the presence of EPI ( $P<0.001$ ; Figure  
328 3C). NRF2 mRNA abundance was increased 1.5-fold and 1.6-fold with 5 and 10  $\mu$ M EPI over  
329 48 h when compared to CTRL ( $P=0.015$  and  $P=0.001$ , respectively). There was a significant  
330 effect of time on superoxide dismutase 2 (SOD2) expression in EPI treated cells only  
331 ( $P=0.024$ ). Multiple comparisons revealed that SOD2 expression was increased 2.1-fold in the  
332 presence of 10  $\mu$ M EPI versus CTRL conditions ( $P=0.040$ ; Figure 3D).

333

334

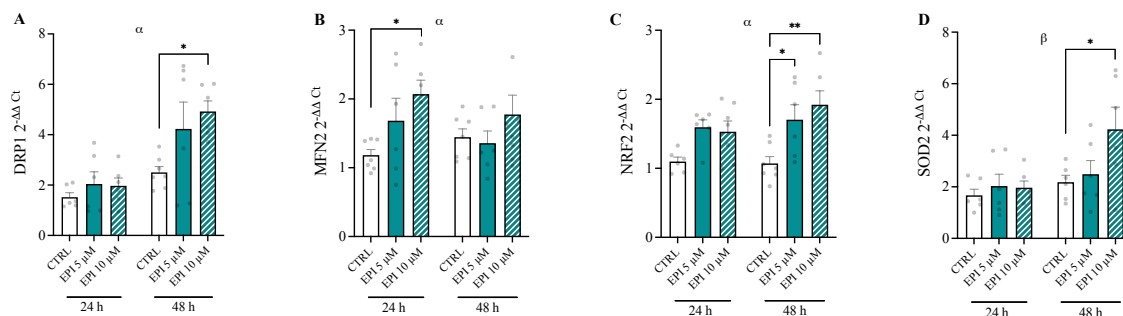

**Figure 3.** Gene expression responses following acute EPI treatment. HUVECs were treated with 0, 5 and 10  $\mu$ M EPI over 48 h and lysed for analysis of gene expression. A) DRP1, B) MFN2, C) NRF2 and D) SOD2. Data are means $\pm$ SEM from 3 independent experiments. Statistical significance was determined by a two-way ANOVA, with dose and time as factors. Multiple comparisons were performed by Dunnett's test to determine differences in gene expression between conditions. <sup>α</sup>Main effect of dose; <sup>β</sup> main effect of time ( $P<0.05$ ); \* $P<0.05$ , \*\* $P<0.01$ .

335

336

337 ***EPI does not alter mitochondrial bioenergetics of vascular endothelial cells***

338 Having described that EPI influences RONS production and alters the expression of  
339 genes linked with mitochondrial function, we tested whether EPI impacted vascular endothelial  
340 cell bioenergetics. There was no significant main effect of EPI on rates of basal respiration,  
341 maximal respiration, ADP phosphorylation, proton leak, spare respiratory capacity (%) or  
342 coupling efficiency, regardless of dose (Figure 4A & 4B & 4D). There was no effect of EPI on  
343 the relative contribution of ATP<sub>glyc</sub> or ATP<sub>ox</sub> to total ATP production (Figure 4C).  
344

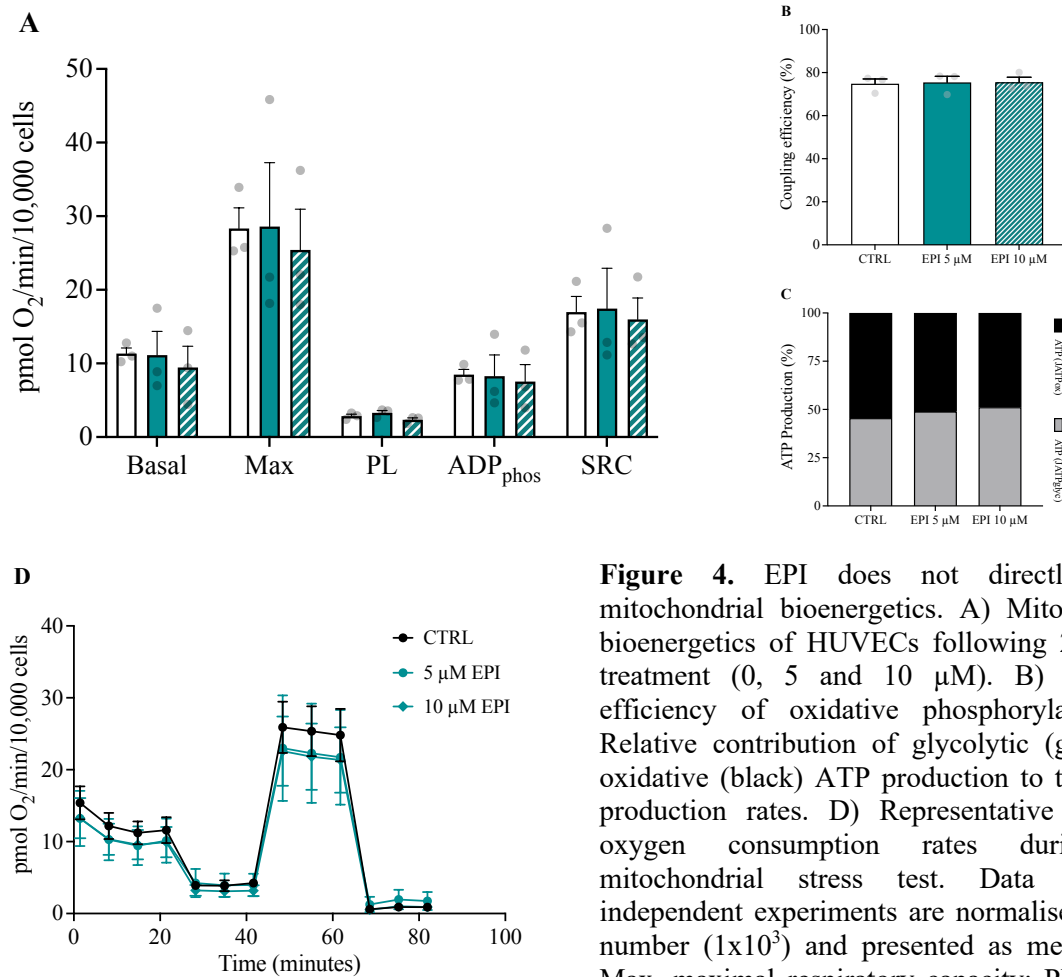

**Figure 4.** EPI does not directly affect mitochondrial bioenergetics. A) Mitochondrial bioenergetics of HUVECs following 24 h EPI treatment (0, 5 and 10  $\mu$ M). B) Coupling efficiency of oxidative phosphorylation. C) Relative contribution of glycolytic (grey) and oxidative (black) ATP production to total ATP production rates. D) Representative trace of oxygen consumption rates during the mitochondrial stress test. Data from 3 independent experiments are normalised to cell number ( $1 \times 10^3$ ) and presented as mean  $\pm$  SEM. Max, maximal respiratory capacity; PL, proton leak; ADP<sub>phos</sub>, ADP phosphorylation; SRC, spare respiratory capacity.

345

346

### 347 *EPI rapidly and transiently promotes ERK1/2 phosphorylation, independent of AMPK*

348 To further probe how EPI might alter vascular endothelial transcription, we assessed  
349 cell signalling responses. There was a significant main effect of treatment and time on AMPK $\alpha$   
350 phosphorylation, and a significant interaction was observed ( $P < 0.001$ ; Figure 5A). Multiple

351 comparisons revealed a significant increase in phosphorylation of AMPK $\alpha$  at Thr172 at 1 h  
 352 versus 0 h (1 h: 2.24 $\pm$ 0.22 vs. 0 h: 1.16 $\pm$ 0.19 AU) under CTRL conditions ( $P=0.006$ ), whereas  
 353 there was no significant change at 1 h versus 0 h with EPI (1 h: 0.47 $\pm$ 0.18 vs. 0 h: 1.16 $\pm$ 0.19  
 354 AU;  $P=0.157$ ). However, there was a significant reduction in AMPK $\alpha$  phosphorylation in the  
 355 presence of EPI vs. CTRL at 15 min (EPI: 0.35 $\pm$ 0.09 vs. CTRL: 1.86 $\pm$ 0.29 AU;  $P<0.001$ ) and  
 356 1 h (EPI: 0.47 $\pm$ 0.18 vs. CTRL: 2.24 $\pm$ 0.22 AU;  $P<0.001$ ). From 3 hours, AMPK $\alpha$   
 357 phosphorylation was suppressed under both CTRL (3 h: 0.54 $\pm$ 0.08 and 24 h: 0.39 $\pm$ 0.12 AU vs.  
 358 0 h: 1.16 $\pm$ 0.19 AU;  $P=0.046$  and  $P=0.026$ , respectively) and EPI conditions compared to 0 h  
 359 CTRL (3 h: 0.37 $\pm$ 0.08 and 24 h: 0.46 $\pm$ 0.08 AU vs. 0 h: 1.16 $\pm$ 0.19 AU;  $P=0.021$  and  $P=0.049$ ,  
 360 respectively).

361

362 Whilst ERK1/2 is not involved in the AMPK/eNOS pathway, ERK1/2 signalling may  
 363 mediate the effects of EPI upon vascular endothelial cell adaptation. There was no main effect  
 364 of treatment ( $P=0.141$ ), but a significant main effect of time on ERK1/2 phosphorylation  
 365 ( $P=0.039$ ; Figure 5B). There was also a significant treatment  $\times$  time interaction ( $P=0.003$ ).  
 366 Under CTRL conditions, despite a 2.7-fold increase in ERK1/2 phosphorylation at 3 h, ERK1/2  
 367 phosphorylation did not reach significance vs. 0 h until 24 hours post treatment (0 h: 0.38 $\pm$ 0.10  
 368 vs. 24 h: 1.15 $\pm$ 0.28 AU;  $P=0.022$ ). By contrast, EPI significantly increased ERK1/2  
 369 phosphorylation at 15 minutes vs. 0 h (15 min: 1.09 $\pm$ 0.24 vs. 0 h: 0.38 $\pm$ 0.10 AU;  $P=0.035$ ),  
 370 which was retained at 1 hour (1 h: 1.22 $\pm$ 0.07 vs. 0 h: 0.38 $\pm$ 0.10 AU;  $P=0.011$ ), before returning  
 371 to baseline levels, suggesting a change in the temporal pattern of ERK1/2 activation because  
 372 of EPI treatment. Indeed at 1-hour, EPI treatment resulted in a 4.3-fold increase in ERK1/2  
 373 phosphorylation vs. the 1-hour untreated CTRL ( $P=0.007$ ).

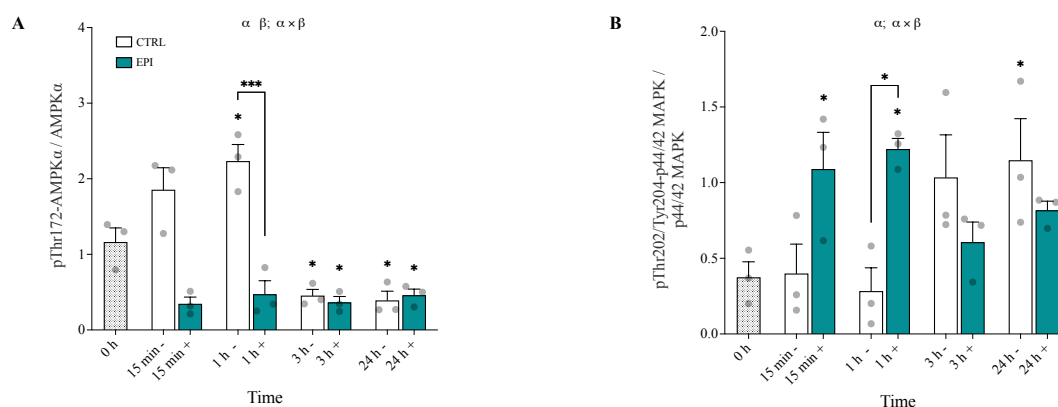

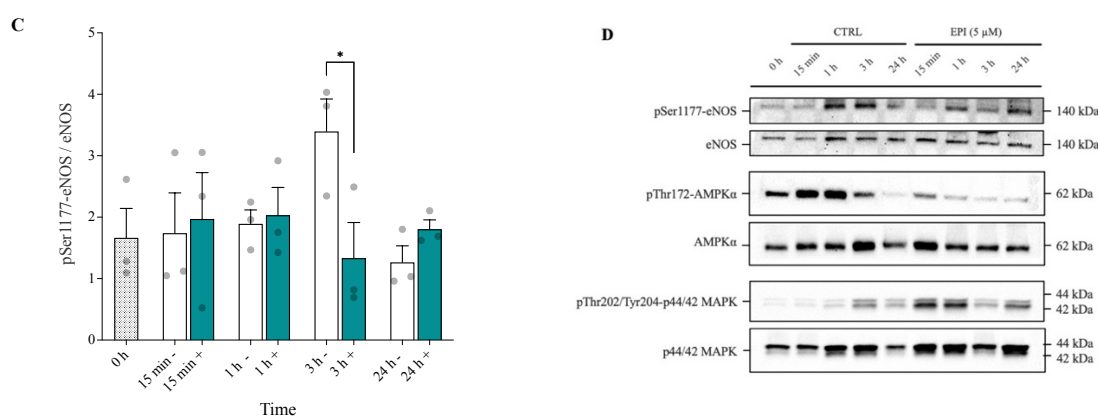

**Figure 5.** EPI rapidly and transiently activates ERK1/2 signalling whilst blunting AMPK phosphorylation. A) AMPK $\alpha$  phosphorylation at Thr172 in HUVECs in the absence (-; clear bars) or presence (+; green bars) of EPI. B) ERK1/2 phosphorylation at Thr202/Tyr204. C) eNOS phosphorylation at Ser1177. D) Representative images of n=3 independent experiments. Cell lysates were analysed by SDS-PAGE and western blotting with indicated antibodies. Data are expressed as means $\pm$ SEM; \* $P$ <0.05 and \*\*\* $P$ <0.001.  $^{\alpha}$  Significant main effect of treatment;  $^{\beta}$  significant main effect of time ( $P$ <0.05).

374

375 To help establish whether the increase in NO brought about by EPI was associated with  
 376 eNOS signalling, phosphorylation of eNOS at Ser1177 was assessed. There was no main effect  
 377 of treatment or time on eNOS phosphorylation (Figure 5C), and no treatment  $\times$  time interaction  
 378 ( $P$ =0.100). At 3 h, eNOS phosphorylation was ~60% higher under CTRL versus EPI conditions  
 379 (CTRL: 0.38 $\pm$ 0.10 vs EPI: 1.15 $\pm$ 0.28 AU,  $P$ =0.038).

380

## 381 Discussion

382 Resolving EPI's mode of action using vascular endothelial cells as a model will help to  
 383 establish its potential efficacy in mitigating vascular endothelial dysfunction. We tested the  
 384 hypothesis that EPI would attenuate ROS production, augment NO bioavailability and enhance  
 385 mitochondrial function of human vascular endothelial cells in culture. We demonstrated that  
 386 physiologic EPI concentrations, dose-dependently, modulated RONS emission but did not  
 387 directly impact mitochondrial respiration. Moreover, the influence of EPI on RONS emission  
 388 was associated with the induction of increased NRF2 mRNA, which appears downstream of  
 389 rapid and transient activation of ERK1/2 signalling. Taken together our findings expand our  
 390 knowledge of EPI's mechanisms of action *in vitro* and support further research on EPI as a  
 391 potential instigator of cell signalling and NRF2 activation *in vivo*.

392

### 393 ***EPI dose-dependently modulates RONS production***

394 We have demonstrated that EPI dose-dependently altered mitochondrial ROS production  
395 in the absence of additional cell stress. Increased rates of mitochondrial ROS production,  
396 reported in the presence of 5  $\mu$ M EPI supports previous observations that 10 days EPI  
397 supplementation increased superoxide production in mitochondria isolated from mouse heart  
398 tissue (Panneerselvam et al., 2013). However, EPI has been demonstrated to increase the  
399 abundance and/or activity of key antioxidant proteins like SOD2 and catalase (Bettaieb et al.,  
400 2014; Calabró et al., 2016), and even to blunt hydrogen peroxide production from isolated brain  
401 and heart mitochondria (Lagoa et al., 2011). In a similar way, we found that higher (10  $\mu$ M)  
402 EPI concentrations attenuated the rate of mitochondrial superoxide production, which may  
403 have been facilitated by increased SOD2 mRNA expression. Clearly and importantly, the  
404 divergent effects of EPI on mitochondrial ROS production suggest EPI's biological effects are  
405 highly dose dependent. Future studies should investigate whether EPI alters the vascular  
406 endothelial cell redox state and its potency relative to known mitochondrial antioxidants.  
407 Another noteworthy observation of this study was that EPI did not rescue AA-induced  
408 increases in mitochondrial ROS. Likewise, one recent study reported that 1  $\mu$ M EPI did not  
409 lower the production of mitochondrial superoxide in HUVECs after acute AA treatment (Keller  
410 et al., 2020), suggesting limited efficacy for EPI in overcoming conditions associated with  
411 elevated mitochondrial ROS production in the vascular endothelium of humans.

412

413 The potent stimulation of NO production by EPI is well documented in studies using cell,  
414 human and rodent models (Loke et al., 2008; Moreno-Ulloa, Mendez-Luna, et al., 2015;  
415 Ramirez-Sanchez et al., 2011, 2018; Schroeter et al., 2006), although not all studies have  
416 reported such effects (Dower et al., 2015). Here, we demonstrated that EPI increased NO levels  
417 of vascular endothelial cells, suggesting that EPI may be a promising strategy to combat  
418 vascular endothelial dysfunction, although further *in vivo* studies are required. Previous studies  
419 have attributed elevated NO bioavailability in the presence of EPI to increased phosphorylation  
420 of eNOS at Ser177 (Carnevale et al., 2014; Ramirez-Sanchez et al., 2010, 2012, 2018; Ramírez-  
421 Sánchez et al., 2016). Given that we and others demonstrated unaltered eNOS phosphorylation  
422 in the presence of EPI (Keller et al., 2020), it is plausible that arginase inhibition is the potential  
423 mechanism by which EPI increases NO production in HUVECs (Schnorr et al., 2008).  
424 However, this may not be the case in arterial endothelial cells, where EPI has repeatedly been



425 shown to enhance eNOS Ser1177 phosphorylation (Ramirez-Sanchez et al., 2012, 2018;  
426 Ramirez-Sánchez et al., 2016).

427

428 ***EPI augments the expression of genes linked with the antioxidant response and***  
429 ***mitochondrial dynamics***

430 To better understand the mechanisms underlying EPI's effects, we measured the  
431 transcription of genes associated with energy metabolism. Interestingly, EPI increased the  
432 expression of genes DRP1 and MFN2, respectively involved in mitochondrial fission and  
433 fusion. Despite these effects, EPI did not impact mitochondrial respiration, at least over 24  
434 hours. Although mitochondrial dynamics can influence respiratory function (Chen et al., 2010;  
435 Glancy et al., 2020), the lack of functional change in mitochondrial respiration could reflect a  
436 discord between cellular mRNA responses and changes in protein abundance and/or function.  
437 Regardless of dose, EPI significantly enhanced NRF2 mRNA expression. This observation  
438 implies that the induction of NRF2 mRNA by EPI is independent of RONS production and  
439 might be explained by alternate factors that control NRF2 activity, like phosphorylation status  
440 (Robledinos-Antón et al., 2019). Although post-translational modifications of NRF2 were not  
441 assessed in this study, flavonoids have been shown to promote NRF2 phosphorylation and  
442 nuclear translocation (Lan et al., 2017; Shi et al., 2018), which would likely increase the  
443 transcription of genes related to the antioxidant response, including NRF2 itself.

444

445 ***EPI does not impact mitochondrial respiration***

446 One important finding was that EPI does not impact mitochondrial respiration of HUVECs  
447 in culture. Although mitochondria have been proposed as potential molecular targets of EPI  
448 (Duluc et al., 2012), previous investigations into EPI's effects on mitochondrial respiration  
449 have produced equivocal results. Some studies have demonstrated increased state 3 respiration  
450 in rat beta cells following EPI (0.1-2.5  $\mu$ M) supplementation (Kener et al., 2018; Rowley et al.,  
451 2017), whilst others have reported inhibited or similar state 3 respiration rates with EPI,  
452 depending on the substrates provided (Kopustinskiene et al., 2015). One recent study using  
453 HUVECs as a model reported that 0.1 and 1  $\mu$ M EPI treatment over 2 hours had negligible  
454 impact on mitochondrial respiration (Keller et al., 2020). Taken together, our data suggest that  
455 the therapeutic potential of EPI is not related to changes in mitochondrial respiration in vascular

456 endothelial cells, pointing to alternate potential mechanisms of action like cell signalling  
457 activation (Fraga et al., 2018).

458

### 459 ***EPI rapidly and transiently activates ERK1/2 signalling***

460 The serine/threonine protein kinase AMPK is an important regulator of mitochondrial  
461 adaptation (Herzig & Shaw, 2018). However, in our studies AMPK phosphorylation was  
462 suppressed in the presence of EPI for up to 1 h and was without further impact for up to 24 h,  
463 compared with controls. Supporting these findings, 2 h EPI treatment (1  $\mu$ M) did not affect the  
464 phosphorylation of AMPK in HUVECs (Keller et al., 2020). Although EPI is capable of  
465 augmenting AMPK activity in liver and muscle tissue, and several cell types (Murase et al.,  
466 2009; Papadimitriou et al., 2014; Si et al., 2011), it seems that AMPK activation is not  
467 responsible for the therapeutic actions of EPI in HUVECs in culture. Together with the  
468 negligible impact of EPI on mitochondrial respiration, the data suggest that EPI does not  
469 directly alter vascular endothelial cell energy metabolism, *in vitro*.

470

471 Importantly and of novelty, we reported that ERK1/2 phosphorylation at Thr202/Tyr204  
472 was rapidly and transiently increased by EPI in HUVECs (Figure 5). This finding supports  
473 recent observations of increased ERK1/2 signalling after 0.1  $\mu$ M EPI treatment in bovine  
474 coronary artery endothelial cells, that may be associated with phosphorylation of CaMKII  
475 (Moreno-Ulloa, Mendez-Luna, et al., 2015). How EPI promotes ERK1/2 phosphorylation in  
476 vascular endothelial cells remains to be described, but current evidence suggests EPI activates  
477 ERK1/2 by binding to the G-protein coupled estrogen receptor (GPER) on the cell membrane  
478 (Moreno-Ulloa, Mendez-Luna, et al., 2015; Yang & Chan, 2018). Given the induction of NRF2  
479 mRNA expression found in this study, it would be useful to determine if acute activation of  
480 ERK1/2 signalling by EPI is a prerequisite for the induction of NRF2 activity.

481

### 482 **Limitations**

483 We did not use metabolites of EPI that appear in circulation after ingestion of EPI-  
484 containing foods or supplements *in vivo* (Ottaviani et al., 2016). Therefore, the present findings  
485 may have limited translational potential. In our study we harnessed HUVECs to model the  
486 vascular endothelial cell, and given that these cells are venous in nature, their physiology may  
487 not well reflect the arterial vasculature or microcirculation where EPI potentially exerts its  
488 beneficial effects. Further, not all assays were performed in the presence of additional cell

489 stress. Thus, caution should be taken when translating our findings to human populations with  
 490 disease. Finally, post-translational modifications of NRF2, which are critical for regulating  
 491 NRF2's activity, were not measured in this study.

492

493 **Conclusion**

494 We demonstrate that physiologic EPI concentrations do not impact mitochondrial  
 495 respiration but do modulate reactive oxygen and nitrogen species production and the signalling  
 496 and transcriptional activities of vascular endothelial cells *in vitro*. EPI's dose-dependent  
 497 alteration of reactive oxygen and nitrogen species production occurred in parallel with  
 498 enhanced and transient ERK1/2 signalling, and the induction of NRF2 mRNA (Figure 6). The  
 499 fact that EPI enhanced NRF2 mRNA expression regardless of dose, implies that alterations in  
 500 reactive oxygen and nitrogen species production alone were not solely responsible. Further  
 501 research will help clarify the precise way in which EPI promotes ERK1/2 signalling and NRF2  
 502 activity, and its relevance to vascular endothelial health *in vivo*.

503

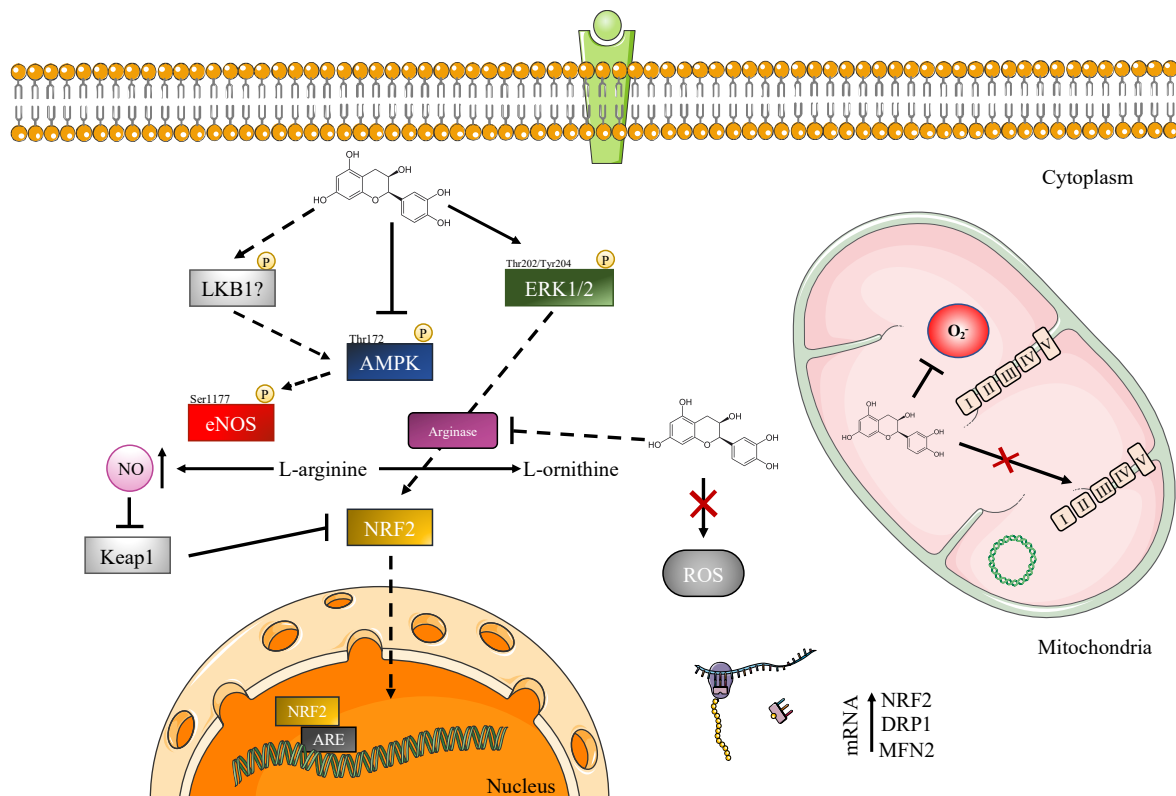

504 **Figure 6.** Schematic of the potential mechanisms by which EPI exerts its biological effects in vascular  
 505 endothelial cells. Solid arrows/lines signify EPI's mode of action demonstrated in this study. Dashed  
 506 arrows represent potential activity of EPI not examined in this study but reported previously.

507

508 **Availability of data and material**

509 The datasets generated and analysed during this study are available from the corresponding  
510 author upon request.

511

512 **Conflict of interest**

513 Daniel G. Sadler, Jonathan Barlow, Helen Jones, Dick H. J. Thijssen and Claire E. Stewart had  
514 no conflict of interest associated with this manuscript. Richard Draijer is employed by  
515 Unilever.

516

517 **Funding**

518 The study was supported by funding received from the Biotechnology and Biological Sciences  
519 Research Council (BBSRC) and Unilever.

520

521 **Authors' contributions**

522 DGS and CES conceived the study and designed experiments. DGS and JB designed the  
523 respiration experiments using the Seahorse XFe96 Analyzer. DGS collected and  
524 analysed the data, DGS, JB, RD, HJ, DHJT and CES interpreted the data. DGS and CES wrote  
525 the manuscript and all authors revised it critically. All authors provided final approval of the  
526 version to be published and agree to be accountable for all aspects of the work in ensuring that  
527 questions related to the accuracy or integrity of any part of the work are appropriately  
528 investigated and resolved. All people designated as authors qualify for authorship, and all those  
529 who qualify for authorship are listed. CES is the guarantor for the work and/or conduct of the  
530 study, had full access to all the data in the study and takes responsibility for the integrity of  
531 data and the accuracy of the data analysis, and controlled the decision to publish.

532

533

534 **Acknowledgements**

535 The authors acknowledge use of the Mitochondrial Profiling Centre, a core resource supported  
536 by the University of Birmingham. This study was supported by the BBSRC funded Industrial  
537 CASE (iCASE) award (BB/P504385/1).

538

539

540 **References**

541

542 Arts, I. C. W., Jacobs, D. R., Harnack, L. J., Gross, M., & Folsom, A. R. (2001). Dietary  
543 catechins in relation to coronary heart disease death among postmenopausal women.  
544 *Epidemiology*. <https://doi.org/10.1097/00001648-200111000-00015>

545 Bettaieb, A., Vazquez Prieto, M. A., Rodriguez Lanzi, C., Miatello, R. M., Haj, F. G., Fraga,  
546 C. G., & Oteiza, P. I. (2014). (-)-Epicatechin mitigates high-fructose-associated  
547 insulin resistance by modulating redox signaling and endoplasmic reticulum stress.  
548 *Free Radical Biology and Medicine*, 72, 247–256.  
549 <https://doi.org/10.1016/j.freeradbiomed.2014.04.011>

550 Burns, E. M., Kruckeberg, T. W., Comerford, L. E., & Buschman, M. T. (1979). Thinning of  
551 capillary walls and declining numbers of endothelial mitochondria in the cerebral  
552 cortex of the aging primate, *Macaca nemestrina*. *Journals of Gerontology*.  
553 <https://doi.org/10.1093/geronj/34.5.642>

554 Calabró, V., Piotrkowski, B., Fischerman, L., Vazquez Prieto, M. A., Galleano, M., & Fraga,  
555 C. G. (2016). Modifications in nitric oxide and superoxide anion metabolism induced  
556 by fructose overload in rat heart are prevented by (-)-epicatechin. *Food & Function*,  
557 7(4), 1876–1883. <https://doi.org/10.1039/C6FO00048G>

558 Carnevale, R., Loffredo, L., Nocella, C., Bartimoccia, S., Bucci, T., De Falco, E., Peruzzi,  
559 M., Chimenti, I., Biondi-Zoccai, G., Pignatelli, P., Violi, F., & Frati, G. (2014).  
560 Epicatechin and catechin modulate endothelial activation induced by platelets of  
561 patients with peripheral artery disease. *Oxidative Medicine and Cellular Longevity*.  
562 <https://doi.org/10.1155/2014/691015>

563 Cernadas, M. R., De Miguel, L. S., García-Durán, M., González-Fernández, F., Millás, I.,  
564 Montón, M., Rodrigo, J., Rico, L., Fernández, P., De Frutos, T., Rodríguez-Feo, J. A.,  
565 Guerra, J., Caramelo, C., Casado, S., & López-Farré, A. (1998). Expression of

566 constitutive and inducible nitric oxide synthases in the vascular wall of young and  
567 aging rats. *Circulation Research*. <https://doi.org/10.1161/01.RES.83.3.279>

568 Chang, M. W. F., Grillari, J., Mayrhofer, C., Fortschegger, K., Allmaier, G., Marzban, G.,  
569 Katinger, H., & Voglauer, R. (2005). Comparison of early passage, senescent and  
570 hTERT immortalized endothelial cells. *Experimental Cell Research*.  
571 <https://doi.org/10.1016/j.yexcr.2005.05.002>

572 Chen, H., Vermulst, M., Wang, Y. E., Chomyn, A., Prolla, T. A., McCaffery, J. M., & Chan,  
573 D. C. (2010). Mitochondrial fusion is required for mtDNA stability in skeletal muscle  
574 and tolerance of mtDNA mutations. *Cell*, *141*(2), 280–289. PubMed.  
575 <https://doi.org/10.1016/j.cell.2010.02.026>

576 Cheung, A. L. (2007). Isolation and Culture of Human Umbilical Vein Endothelial Cells  
577 (HUVEC). In *Current Protocols in Microbiology*.  
578 <https://doi.org/10.1002/9780471729259.mca04bs4>

579 Chou, T. C., Yen, M. H., Li, C. Y., & Ding, Y. A. (1998). Alterations of nitric oxide synthase  
580 expression with aging and hypertension in rats. *Hypertension*.  
581 <https://doi.org/10.1161/01.HYP.31.2.643>

582 Csiszar, A., Labinsky, N., Orosz, Z., Xiangmin, Z., Buffenstein, R., & Ungvari, Z. (2007).  
583 Vascular aging in the longest-living rodent, the naked mole rat. *American Journal of*  
584 *Physiology - Heart and Circulatory Physiology*.  
585 <https://doi.org/10.1152/ajpheart.01287.2006>

586 Csiszar, A., Ungvari, Z., Edwards, J. G., Kaminski, P., Wolin, M. S., Koller, A., & Kaley, G.  
587 (2002). Aging-induced phenotypic changes and oxidative stress impair coronary  
588 arteriolar function. *Circulation Research*.  
589 <https://doi.org/10.1161/01.RES.0000020401.61826.EA>

590 Donato, A. J., Eskurza, I., Silver, A. E., Levy, A. S., Pierce, G. L., Gates, P. E., & Seals, D.  
591 R. (2007). Direct evidence of endothelial oxidative stress with aging in humans:  
592 Relation to impaired endothelium-dependent dilation and upregulation of nuclear  
593 factor- $\kappa$ B. *Circulation Research*.  
594 <https://doi.org/10.1161/01.RES.0000269183.13937.e8>

595 Donato, A. J., Gano, L. B., Eskurza, I., Silver, A. E., Gates, P. E., Jablonski, K., & Seals, D.  
596 R. (2009). Vascular endothelial dysfunction with aging: Endothelin-1 and endothelial  
597 nitric oxide synthase. *American Journal of Physiology - Heart and Circulatory*  
598 *Physiology*. <https://doi.org/10.1152/ajpheart.00689.2008>

599 Dower, J. I., Geleijnse, J. M., Gijssbers, L., Zock, P. L., Kromhout, D., & Hollman, P. C. H.  
600 (2015). Effects of the pure flavonoids epicatechin and quercetin on vascular function  
601 and cardiometabolic health: A randomized, double-blind, placebo-controlled,  
602 crossover trial. *American Journal of Clinical Nutrition*.  
603 <https://doi.org/10.3945/ajcn.114.098590>

604 Duluc, L., Soleti, R., Clere, N., Andriantsitohaina, R., & Simard, G. (2012). Mitochondria As  
605 Potential Targets of Flavonoids: Focus on Adipocytes and Endothelial Cells. *Current*  
606 *Medicinal Chemistry*. <https://doi.org/10.2174/092986712803251467>

607 Fraga, C. G., Oteiza, P. I., & Galleano, M. (2018). Plant bioactives and redox signaling: (–)-  
608 Epicatechin as a paradigm. *Molecular Aspects of Medicine*.  
609 <https://doi.org/10.1016/j.mam.2018.01.007>

610 Galleano, M., Bernatova, I., Puzserova, A., Balis, P., Sestakova, N., Pechanova, O., & Fraga,  
611 C. G. (2013). Epicatechin reduces blood pressure and improves vasorelaxation in  
612 spontaneously hypertensive rats by NO-mediated mechanism. *IUBMB Life*.  
613 <https://doi.org/10.1002/iub.1185>

614 Gioscia-Ryan, R. A., LaRocca, T. J., Sindler, A. L., Zigler, M. C., Murphy, M. P., & Seals,  
615 D. R. (2014). Mitochondria-targeted antioxidant (MitoQ) ameliorates age-related  
616 arterial endothelial dysfunction in mice. *Journal of Physiology*.  
617 <https://doi.org/10.1113/jphysiol.2013.268680>

618 Glancy, B., Kim, Y., Katti, P., & Willingham, T. B. (2020). The Functional Impact of  
619 Mitochondrial Structure Across Subcellular Scales. *Frontiers in Physiology*, *11*, 1462.  
620 <https://doi.org/10.3389/fphys.2020.541040>

621 Gliemann, L., Rytter, N., Piil, P., Nilton, J., Lind, T., Nyberg, M., Cocks, M., & Hellsten, Y.  
622 (2018). The Endothelial Mechanotransduction Protein Platelet Endothelial Cell  
623 Adhesion Molecule-1 Is Influenced by Aging and Exercise Training in Human  
624 Skeletal Muscle. *Frontiers in Physiology*, *9*, 1807.  
625 <https://doi.org/10.3389/fphys.2018.01807>

626 Gouill, E. Le, Jimenez, M., Binnert, C., Jayet, P.-Y., Thalmann, S., Nicod, P., Scherrer, U., &  
627 Vollenweider, P. (2007). Endothelial Nitric Oxide Synthase (eNOS) Knockout Mice  
628 Have Defective Mitochondrial  $\beta$ -Oxidation. *Diabetes*, *56*(11), 2690 LP – 2696.  
629 <https://doi.org/10.2337/db06-1228>

630 Grillari, J., Hohenwarter, O., Grabherr, R. M., & Katinger, H. (2000). Subtractive  
631 hybridization of mRNA from early passage and senescent endothelial cells.  
632 *Experimental Gerontology*. [https://doi.org/10.1016/S0531-5565\(00\)00080-2](https://doi.org/10.1016/S0531-5565(00)00080-2)

633 Hamilton, C. A., Brosnan, M. J., McIntyre, M., Graham, D., & Dominiczak, A. F. (2001).  
634 Superoxide excess in hypertension and aging a common cause of endothelial  
635 dysfunction. *Hypertension*. <https://doi.org/10.1161/01.HYP.37.2.529>

636 Heitzer, T., Schlinzig, T., Krohn, K., Meinertz, T., & Münzel, T. (2001). Endothelial  
637 Dysfunction, Oxidative Stress, and Risk of Cardiovascular Events in Patients With



638 Coronary Artery Disease. *Circulation*, 104(22), 2673–2678.  
639 <https://doi.org/10.1161/hc4601.099485>

640 Hertog, M. G. L., Feskens, E. J. M., Kromhout, D., Hertog, M. G. L., Hollman, P. C. H.,  
641 Hertog, M. G. L., & Katan, M. B. (1993). Dietary antioxidant flavonoids and risk of  
642 coronary heart disease: The Zutphen Elderly Study. *The Lancet*.  
643 [https://doi.org/10.1016/0140-6736\(93\)92876-U](https://doi.org/10.1016/0140-6736(93)92876-U)

644 Herzig, S., & Shaw, R. J. (2018). AMPK: guardian of metabolism and mitochondrial  
645 homeostasis. *Nature Reviews. Molecular Cell Biology*, 19(2), 121–135. PubMed.  
646 <https://doi.org/10.1038/nrm.2017.95>

647 Hollands, W. J., Hart, D. J., Dainty, J. R., Hasselwander, O., Tiihonen, K., Wood, R., &  
648 Kroon, P. A. (2013). Bioavailability of epicatechin and effects on nitric oxide  
649 metabolites of an apple flavanol-rich extract supplemented beverage compared to a  
650 whole apple puree: A randomized, placebo-controlled, crossover trial. *Molecular*  
651 *Nutrition & Food Research*, 57(7), 1209–1217.  
652 <https://doi.org/10.1002/mnfr.201200663>

653 Jablonski, K. L., Seals, D. R., Eskurza, I., Monahan, K. D., & Donato, A. J. (2007). High-  
654 dose ascorbic acid infusion abolishes chronic vasoconstriction and restores resting leg  
655 blood flow in healthy older men. *Journal of Applied Physiology*.  
656 <https://doi.org/10.1152/jappphysiol.00533.2007>

657 Karim, M., McCormick, K., & Kappagoda, C. T. (2000). Effects of Cocoa Extracts on  
658 Endothelium-Dependent Relaxation. *The Journal of Nutrition*.  
659 <https://doi.org/10.1093/jn/130.8.2105s>

660 Keller, A., Hull, S. E., Elajaili, H., Johnston, A., Knaub, L. A., Chun, J. H., Walker, L.,  
661 Nozik-Grayck, E., & Reusch, J. E. B. (2020). (–)-Epicatechin Modulates  
662 Mitochondrial Redox in Vascular Cell Models of Oxidative Stress. *Oxidative*

663 *Medicine and Cellular Longevity*, 2020, 6392629.  
664 <https://doi.org/10.1155/2020/6392629>

665 Kener, K. B., Munk, D. J., Hancock, C. R., & Tessem, J. S. (2018). High-resolution  
666 respirometry to measure mitochondrial function of intact beta cells in the presence of  
667 natural compounds. *Journal of Visualized Experiments*. <https://doi.org/10.3791/57053>

668 Kopustinskiene, D. M., Savickas, A., Vetchý, D., Masteikova, R., Kasauskas, A., &  
669 Bernatoniene, J. (2015). Direct effects of (-)-Epicatechin and procyanidin B2 on the  
670 respiration of rat heart mitochondria. *BioMed Research International*.  
671 <https://doi.org/10.1155/2015/232836>

672 Lagoa, R., Graziani, I., Lopez-Sanchez, C., Garcia-Martinez, V., & Gutierrez-Merino, C.  
673 (2011). Complex I and cytochrome c are molecular targets of flavonoids that inhibit  
674 hydrogen peroxide production by mitochondria. *Biochimica et Biophysica Acta -*  
675 *Bioenergetics*. <https://doi.org/10.1016/j.bbabi.2011.09.022>

676 Lan, X., Han, X., Li, Q., & Wang, J. (2017). (-)-Epicatechin, a Natural Flavonoid Compound,  
677 Protects Astrocytes Against Hemoglobin Toxicity via Nrf2 and AP-1 Signaling  
678 Pathways. *Molecular Neurobiology*, 54(10), 7898–7907. PubMed.  
679 <https://doi.org/10.1007/s12035-016-0271-y>

680 Lee, I., Hüttemann, M., Kruger, A., Bollig-Fischer, A., & Malek, M. H. (2015). (-)-  
681 Epicatechin combined with 8 weeks of treadmill exercise is associated with increased  
682 angiogenic and mitochondrial signaling in mice. *Frontiers in Pharmacology*.  
683 <https://doi.org/10.3389/fphar.2015.00043>

684 Lesniewski, L. A., Zigler, M. C., Durrant, J. R., Donato, A. J., & Seals, D. R. (2012).  
685 Sustained activation of AMPK ameliorates age-associated vascular endothelial  
686 dysfunction via a nitric oxide-independent mechanism. *Mechanisms of Ageing and*  
687 *Development*. <https://doi.org/10.1016/j.mad.2012.03.011>

688 Livak, K. J., & Schmittgen, T. D. (2001). Analysis of relative gene expression data using  
689 real-time quantitative PCR and the  $2^{-\Delta\Delta CT}$  method. *Methods*.  
690 <https://doi.org/10.1006/meth.2001.1262>

691 Loke, W. M., Hodgson, J. M., Proudfoot, J. M., McKinley, A. J., Puddey, I. B., & Croft, K.  
692 D. (2008). Pure dietary flavonoids quercetin and (-)-epicatechin augment nitric oxide  
693 products and reduce endothelin-1 acutely in healthy men. *American Journal of*  
694 *Clinical Nutrition*. <https://doi.org/10.1093/ajcn/88.4.1018>

695 Miller, M. W., Knaub, L. A., Olivera-Fragoso, L. F., Keller, A. C., Balasubramaniam, V.,  
696 Watson, P. A., & Reusch, J. E. B. (2013). Nitric oxide regulates vascular adaptive  
697 mitochondrial dynamics. *American Journal of Physiology - Heart and Circulatory*  
698 *Physiology*. <https://doi.org/10.1152/ajpheart.00987.2012>

699 Mookerjee, S. A., & Brand, M. D. (2015). Measurement and analysis of extracellular acid  
700 production to determine glycolytic rate. *Journal of Visualized Experiments*.  
701 <https://doi.org/10.3791/53464>

702 Moreno-Ulloa, A., Mendez-Luna, D., Beltran-Partida, E., Castillo, C., Guevara, G., Ramirez-  
703 Sanchez, I., Correa-Basurto, J., Ceballos, G., & Villarreal, F. (2015). The effects of (-)  
704 )-epicatechin on endothelial cells involve the G protein-coupled estrogen receptor  
705 (GPER). *Pharmacological Research*. <https://doi.org/10.1016/j.phrs.2015.08.014>

706 Moreno-Ulloa, A., Nogueira, L., Rodriguez, A., Barboza, J., Hogan, M. C., Ceballos, G.,  
707 Villarreal, F., & Ramirez-Sanchez, I. (2015). Recovery of Indicators of Mitochondrial  
708 Biogenesis, Oxidative Stress, and Aging With (-)-Epicatechin in Senile Mice.  
709 *Journals of Gerontology - Series A Biological Sciences and Medical Sciences*.  
710 <https://doi.org/10.1093/gerona/glu131>

711 Murase, T., Misawa, K., Haramizu, S., & Hase, T. (2009). Catechin-induced activation of the  
712 LKB1/AMP-activated protein kinase pathway. *Biochemical Pharmacology*.  
713 <https://doi.org/10.1016/j.bcp.2009.03.021>

714 Musicki, B., Kramer, M. F., Becker, R. E., & Burnett, A. L. (2005). Age-Related Changes in  
715 Phosphorylation of Endothelial Nitric Oxide Synthase in the Rat Penis. *The Journal of*  
716 *Sexual Medicine*, 2(3), 347–357. <https://doi.org/10.1111/j.1743-6109.2005.20349.x>

717 Ottaviani, J. I., Borges, G., Momma, T. Y., Spencer, J. P. E., Keen, C. L., Crozier, A., &  
718 Schroeter, H. (2016). The metabolome of [2-(14)C](-)-epicatechin in humans:  
719 Implications for the assessment of efficacy, safety, and mechanisms of action of  
720 polyphenolic bioactives. *Scientific Reports*, 6, 29034.  
721 <https://doi.org/10.1038/srep29034>

722 Panneerselvam, M., Ali, S. S., Finley, J. C., Kellerhals, S. E., Migita, M. Y., Head, B. P.,  
723 Patel, P. M., Roth, D. M., & Patel, H. H. (2013). Epicatechin regulation of  
724 mitochondrial structure and function is opioid receptor dependent. *Molecular*  
725 *Nutrition & Food Research*, 57(6), 1007–1014.  
726 <https://doi.org/10.1002/mnfr.201300026>

727 Papadimitriou, A., Peixoto, E. B. M. I., Silva, K. C., Lopes de Faria, J. M., & Lopes de Faria,  
728 J. B. (2014). Increase in AMPK brought about by cocoa is renoprotective in  
729 experimental diabetes mellitus by reducing NOX4/TGFβ-1 signaling. *The Journal of*  
730 *Nutritional Biochemistry*, 25(7), 773–784.  
731 <https://doi.org/10.1016/j.jnutbio.2014.03.010>

732 Park, S. H., Kwon, O. S., Park, S.-Y., Weavil, J. C., Andtbacka, R. H. I., Hyngstrom, J. R.,  
733 Reese, V., & Richardson, R. S. (2018). Vascular mitochondrial respiratory function:  
734 The impact of advancing age. *American Journal of Physiology. Heart and Circulatory*

735           *Physiology*, 315(6), H1660–H1669. PubMed.  
736           <https://doi.org/10.1152/ajpheart.00324.2018>

737 Park, S.-Y., Kwon, O. S., Andtbacka, R. H. I., Hyngstrom, J. R., Reese, V., Murphy, M. P., &  
738           Richardson, R. S. (2018). Age-related endothelial dysfunction in human skeletal  
739           muscle feed arteries: The role of free radicals derived from mitochondria in the  
740           vasculature. *Acta Physiologica*, 222(1), e12893. <https://doi.org/10.1111/apha.12893>

741 Park, S.-Y., Pekas, E. J., Headid, R. J., Son, W.-M., Wooden, T. K., Song, J., Layec, G.,  
742           Yadav, S. K., Mishra, P. K., & Pipinos, I. I. (2020). Acute mitochondrial antioxidant  
743           intake improves endothelial function, antioxidant enzyme activity, and exercise  
744           tolerance in patients with peripheral artery disease. *American Journal of Physiology-  
745           Heart and Circulatory Physiology*, 319(2), H456–H467.  
746           <https://doi.org/10.1152/ajpheart.00235.2020>

747 Ramirez-Sanchez, I., Aguilar, H., Ceballos, G., & Villarreal, F. (2012). (-)-Epicatechin-  
748           induced calcium independent eNOS activation: Roles of HSP90 and AKT. *Molecular  
749           and Cellular Biochemistry*. <https://doi.org/10.1007/s11010-012-1405-9>

750 Ramirez-Sanchez, I., De Los Santos, S., Gonzalez-Basurto, S., Canto, P., Mendoza-Lorenzo,  
751           P., Palma-Flores, C., Ceballos-Reyes, G., Villarreal, F., Zentella-Dehesa, A., & Coral-  
752           Vazquez, R. (2014). (-)-Epicatechin improves mitochondrial-related protein levels  
753           and ameliorates oxidative stress in dystrophic  $\delta$ -sarcoglycan null mouse striated  
754           muscle. *FEBS Journal*. <https://doi.org/10.1111/febs.13098>

755 Ramirez-Sanchez, I., Mansour, C., Navarrete-Yañez, V., Ayala-Hernandez, M., Guevara, G.,  
756           Castillo, C., Loredó, M., Bustamante, M., Ceballos, G., & Villarreal, F. J. (2018). (-)-  
757           Epicatechin induced reversal of endothelial cell aging and improved vascular  
758           function: Underlying mechanisms. *Food and Function*.  
759           <https://doi.org/10.1039/c8fo00483h>

760 Ramirez-Sanchez, I., Maya, L., Ceballos, G., & Villarreal, F. (2010). (-)-Epicatechin  
761 activation of endothelial cell endothelial nitric oxide synthase, nitric oxide, and  
762 related signaling pathways. *Hypertension*, *55*(6), 1398–1405.  
763 <https://doi.org/10.1161/HYPERTENSIONAHA.109.147892>

764 Ramirez-Sanchez, I., Maya, L., Ceballos, G., & Villarreal, F. (2011). (-)-Epicatechin induces  
765 calcium and translocation independent eNOS activation in arterial endothelial cells.  
766 *American Journal of Physiology - Cell Physiology*.  
767 <https://doi.org/10.1152/ajpcell.00406.2010>

768 Ramírez-Sánchez, I., Rodríguez, A., Moreno-Ulloa, A., Ceballos, G., & Villarreal, F. (2016).  
769 (-)-Epicatechin-induced recovery of mitochondria from simulated diabetes: Potential  
770 role of endothelial nitric oxide synthase. *Diabetes and Vascular Disease Research*.  
771 <https://doi.org/10.1177/1479164115620982>

772 Robledinos-Antón, N., Fernández-Ginés, R., Manda, G., & Cuadrado, A. (2019). Activators  
773 and Inhibitors of NRF2: A Review of Their Potential for Clinical Development.  
774 *Oxidative Medicine and Cellular Longevity*, *2019*, 9372182.  
775 <https://doi.org/10.1155/2019/9372182>

776 Rowley, T. J., Bitner, B. F., Ray, J. D., Lathen, D. R., Smithson, A. T., Dallon, B. W.,  
777 Plowman, C. J., Bikman, B. T., Hansen, J. M., Dorenkott, M. R., Goodrich, K. M.,  
778 Ye, L., O’Keefe, S. F., Neilson, A. P., & Tessem, J. S. (2017). Monomeric cocoa  
779 catechins enhance  $\beta$ -cell function by increasing mitochondrial respiration. *Journal of*  
780 *Nutritional Biochemistry*. <https://doi.org/10.1016/j.jnutbio.2017.07.015>

781 Schnorr, O., Brossette, T., Momma, T. Y., Kleinbongard, P., Keen, C. L., Schroeter, H., &  
782 Sies, H. (2008). Cocoa flavanols lower vascular arginase activity in human  
783 endothelial cells in vitro and in erythrocytes in vivo. *Archives of Biochemistry and*  
784 *Biophysics*. <https://doi.org/10.1016/j.abb.2008.02.040>

785 Schroeter, H., Heiss, C., Balzer, J., Kleinbongard, P., Keen, C. L., Hollenberg, N. K., Sies,  
786 H., Kwik-Urbe, C., Schmitz, H. H., & Kelm, M. (2006). (-)-Epicatechin mediates  
787 beneficial effects of flavanol-rich cocoa on vascular function in humans. *Proceedings*  
788 *of the National Academy of Sciences of the United States of America*, *103*(4), 1024–  
789 1029. <https://doi.org/10.1073/pnas.0510168103>

790 Shi, L., Hao, Z., Zhang, S., Wei, M., Lu, B., Wang, Z., & Ji, L. (2018). Baicalein and baicalin  
791 alleviate acetaminophen-induced liver injury by activating Nrf2 antioxidative  
792 pathway: The involvement of ERK1/2 and PKC. *Biochemical Pharmacology*, *150*, 9–  
793 23. <https://doi.org/10.1016/j.bcp.2018.01.026>

794 Si, H., Fu, Z., Babu, P. V. A., Zhen, W., LeRoith, T., Meaney, M. P., Voelker, K. A., Jia, Z.,  
795 Grange, R. W., & Liu, D. (2011). Dietary epicatechin promotes survival of obese  
796 diabetic mice and *Drosophila melanogaster*. *Journal of Nutrition*.  
797 <https://doi.org/10.3945/jn.110.134270>

798 Sun, D., Huang, A., Yan, E. H., Wu, Z., Yan, C., Kaminski, P. M., Oury, T. D., Wolin, M. S.,  
799 & Kaley, G. (2004). Reduced release of nitric oxide to shear stress in mesenteric  
800 arteries of aged rats. *American Journal of Physiology - Heart and Circulatory*  
801 *Physiology*. <https://doi.org/10.1152/ajpheart.00854.2003>

802 Suwaidi, J. A., Hamasaki, S., Higano, S. T., Nishimura, R. A., Holmes, D. R., & Lerman, A.  
803 (2000). Long-Term Follow-Up of Patients With Mild Coronary Artery Disease and  
804 Endothelial Dysfunction. *Circulation*, *101*(9), 948–954.  
805 <https://doi.org/10.1161/01.CIR.101.9.948>

806 Taub, P. R., Ramirez-Sanchez, I., Ciaraldi, T. P., Perkins, G., Murphy, A. N., Naviaux, R.,  
807 Hogan, M., Maisel, A. S., Henry, R. R., Ceballos, G., & Villarreal, F. (2012).  
808 Alterations in Skeletal Muscle Indicators of Mitochondrial Structure and Biogenesis  
809 in Patients with Type 2 Diabetes and Heart Failure: Effects of Epicatechin Rich

810 Cocoa. *Clinical and Translational Science*. <https://doi.org/10.1111/j.1752->  
811 8062.2011.00357.x

812 Taub, P. R., Ramirez-Sanchez, I., Patel, M., Higginbotham, E., Moreno-Ulloa, A., Román-  
813 Pintos, L. M., Phillips, P., Perkins, G., Ceballos, G., & Villarreal, F. (2016).  
814 Beneficial effects of dark chocolate on exercise capacity in sedentary subjects:  
815 Underlying mechanisms. A double blind, randomized, placebo controlled trial. *Food*  
816 *and Function*. <https://doi.org/10.1039/c6fo00611f>

817 Ungvari, Z., Labinskyy, N., Gupte, S., Chander, P. N., Edwards, J. G., & Csiszar, A. (2008).  
818 Dysregulation of mitochondrial biogenesis in vascular endothelial and smooth muscle  
819 cells of aged rats. *American Journal of Physiology - Heart and Circulatory*  
820 *Physiology*. <https://doi.org/10.1152/ajpheart.00012.2008>

821 Van Der Loo, B., Labugger, R., Skepper, J. N., Bachschmid, M., Kilo, J., Powell, J. M.,  
822 Palacios-Callender, M., Erusalimsky, J. D., Quaschnig, T., Malinski, T., Gygi, D.,  
823 Ullrich, V., & Lüscher, T. F. (2000). Enhanced peroxynitrite formation is associated  
824 with vascular aging. *Journal of Experimental Medicine*.  
825 <https://doi.org/10.1084/jem.192.12.1731>

826 Yang, K., & Chan, C. B. (2018). Epicatechin potentiation of glucose-stimulated insulin  
827 secretion in INS-1 cells is not dependent on its antioxidant activity. *Acta*  
828 *Pharmacologica Sinica*. <https://doi.org/10.1038/aps.2017.174>

829 Zielonka, J., Joseph, J., Sikora, A., Hardy, M., Ouari, O., Vasquez-Vivar, J., Cheng, G.,  
830 Lopez, M., & Kalyanaraman, B. (2017). Mitochondria-Targeted  
831 Triphenylphosphonium-Based Compounds: Syntheses, Mechanisms of Action, and  
832 Therapeutic and Diagnostic Applications. *Chemical Reviews*, 117(15), 10043–10120.  
833 PubMed. <https://doi.org/10.1021/acs.chemrev.7b00042>

834  
835
